# Supplementary material for: Tailoring Interfacial Adhesion between PBAT Matrix and PTFE-Modified Microcrystalline Cellulose Additive for Advanced Composites
Source: MDPI journal article supplement (doi:10.3390/polym14101973), 2022-05-12
Supplement: s1 [file s1]

# Supplementary Materials: Tailoring Interfacial Adhesion Between PBAT Matrix and PTFE-modified Microcrystalline Cellulose Additive for Advanced Composites

Hongkun Wang <sup>1,2</sup>, Xuran Liu <sup>3</sup>, Jinfeng Liu <sup>1</sup>, Min Wu <sup>1,\*</sup> and Yong Huang <sup>1,\*</sup>

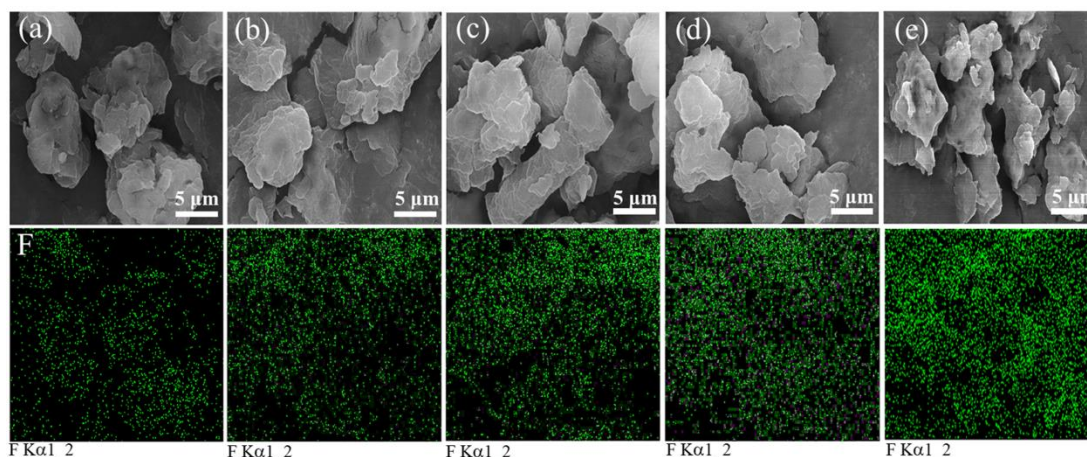

**Figure S1.** SEM images and EDS mappings referring to F element of 3h ball milled microcrystalline cellulose with different PTFE addition, a) 0.2%, b) 0.5%, c) 1%, d) 2%, e) 4%.

**Table S1.** DMA dates of PBAT/N#MCC composites

| Composites   | E' at -40°C/MPa | E' at -20°C/MPa | E'' at -40°C/MPa | E'' at -20°C/MPa | T <sub>g</sub> /°C |
|--------------|-----------------|-----------------|------------------|------------------|--------------------|
| PBAT         | 1754.5          | 372.1           | 161.8            | 129.5            | -30.56             |
| PBAT/0#MCC   | 1524.9          | 312.2           | 241.2            | 90.9             | -36.55             |
| PBAT/0.2#MCC | 1957.7          | 439.9           | 192.3            | 160.6            | -30.09             |
| PBAT/0.5#MCC | 2180.4          | 455.7           | 179.8            | 157.4            | -29.73             |
| PBAT/1#MCC   | 2127.9          | 427.9           | 172.5            | 148.5            | -29.85             |
| PBAT/2#MCC   | 1826.5          | 416.0           | 182.6            | 143.2            | -29.67             |
| PBAT/4#MCC   | 2086.3          | 535.5           | 181.7            | 183.9            | -28.72             |

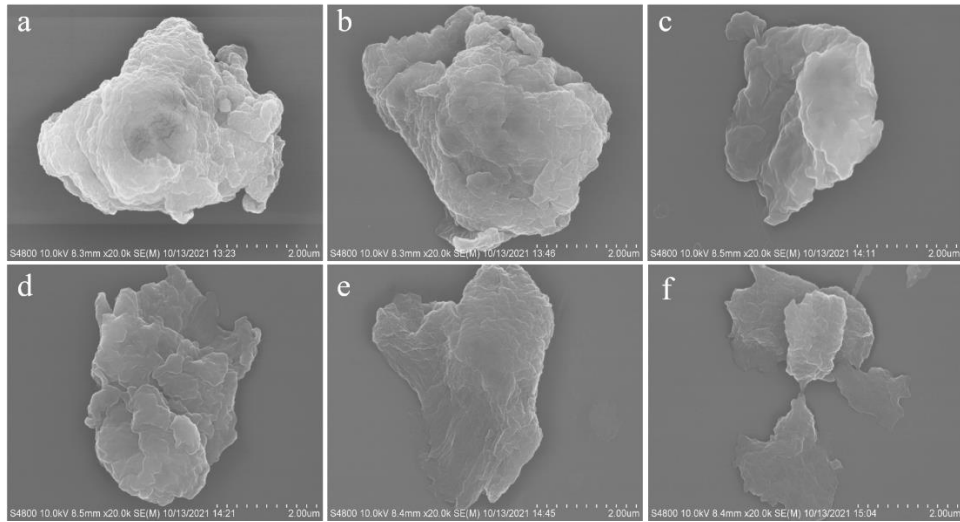

**Figure S2.** The raw date of Figure 1, SEM images of ball milled microcrystalline cellulose with different PTFE addition, (a) 0.2%, (b) 0.5%, (c) 1%, (d) 2%, (e) 4%.

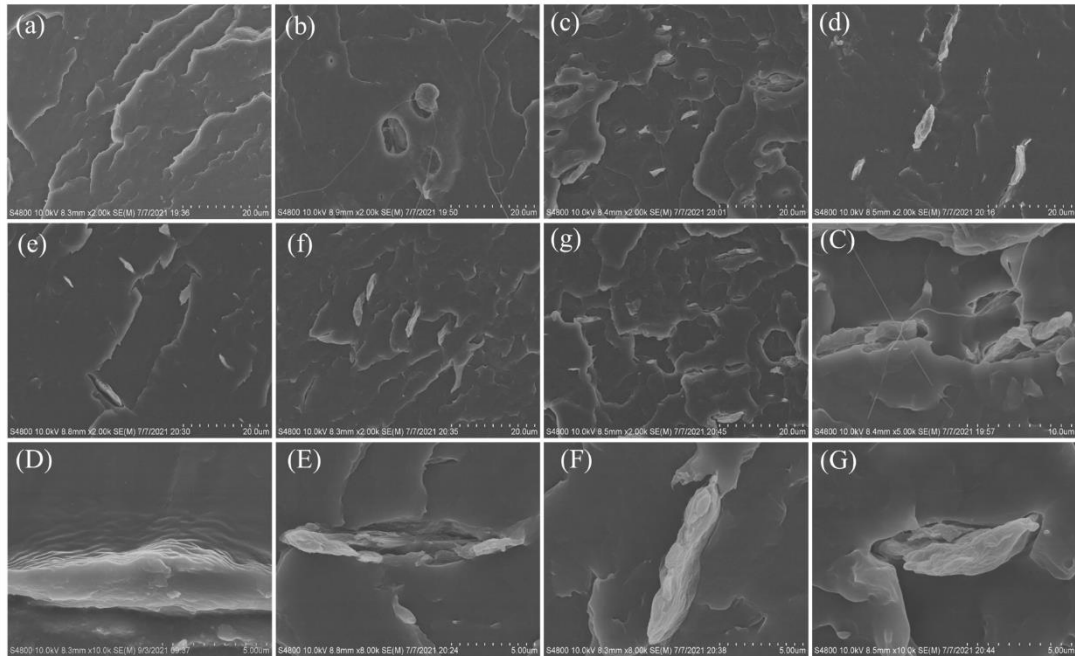

**Figure S3.** The raw date of Figure 6, SEM fractography of composites, (a) pure PBAT, (b) PBAT/0#MCC, (c, C) PBAT/0.2#MCC, (d, D) PBAT/0.5#MCC, (e, E) PBAT/1#MCC, (f, F) PBAT/2#MCC, (g, G) PBAT/4#MCC

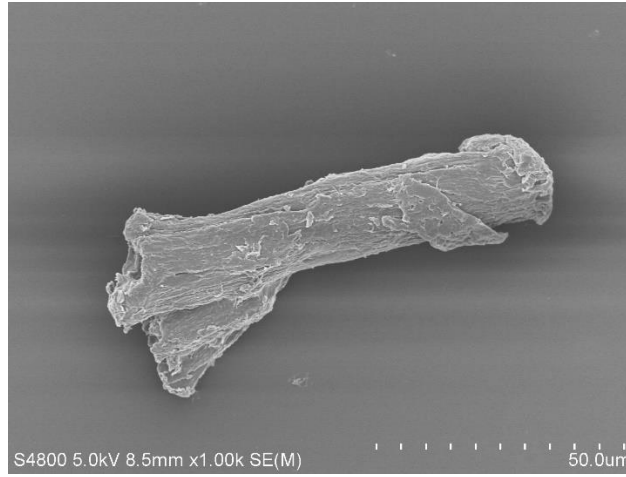

**Figure S4.** SEM image of the pristine MCC particle before the ball milling

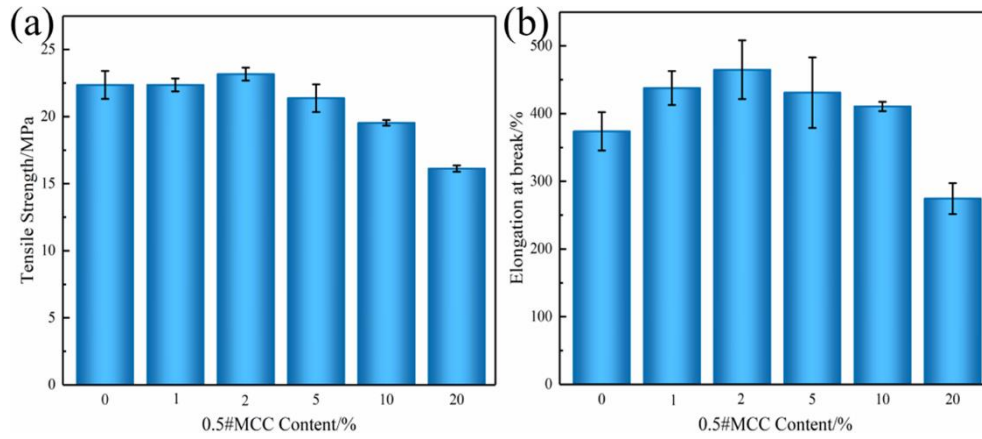

**Figure S5.** Mechanical properties of PBAT/0.5#MCC composites with different contents of 0.5#MCC a) tensile strength, b) elongation at break.

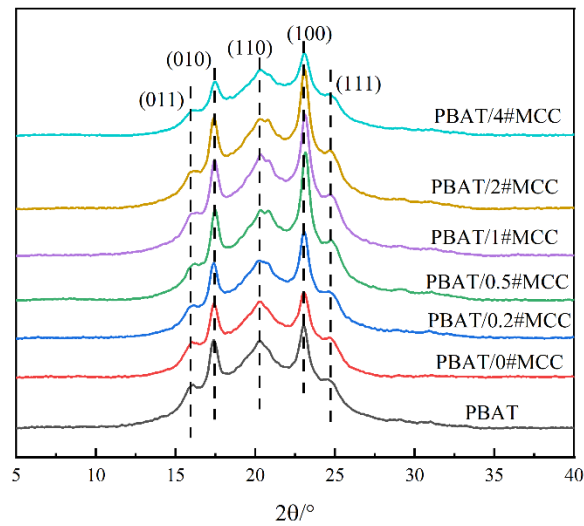

**Figure S6.** X-ray diffractograms of the PBAT/N#MCC composites

**Table S2:** XRD analysis of PBAT/N#MCC composites

| Composites   | Apparent Crystal Size (nm) |       |       |       |       |           |
|--------------|----------------------------|-------|-------|-------|-------|-----------|
|              | (011)                      | (010) | (110) | (100) | (111) | $\bar{A}$ |
| PBAT         | 11.78                      | 15.47 | 8.92  | 13.52 | 19.86 | 13.91     |
| PBAT/0#MCC   | 10.03                      | 17.46 | 9.34  | 14.16 | 10.45 | 12.29     |
| PBAT/0.2#MCC | 12.15                      | 17.50 | 8.44  | 14.92 | 10.69 | 12.74     |
| PBAT/0.5#MCC | 11.93                      | 17.23 | 8.64  | 14.63 | 9.18  | 12.32     |
| PBAT/1#MCC   | 9.96                       | 17.27 | 9.32  | 14.24 | 9.46  | 12.05     |
| PBAT/2#MCC   | 10.21                      | 16.83 | 8.19  | 14.76 | 11.45 | 12.29     |
| PBAT/4#MCC   | 11.49                      | 16.18 | 9.31  | 13.36 | 12.35 | 12.54     |
